# Supplementary material
Source: PubMed Central journal article supplement (PMC4215899)
Supplement: bm5004527_si_001.pdf [file bm5004527_si_001.pdf]

# Supporting Information

## Investigating the Effects of Block versus Statistical Glycopolycations Containing Primary and Tertiary Amines for Plasmid DNA Delivery

*Dustin Sprouse and Theresa M. Reineke\**

University of Minnesota. 207 Pleasant St. SE. Minneapolis, MN 55455  
[Spro0059@umn.edu](mailto:Spro0059@umn.edu)

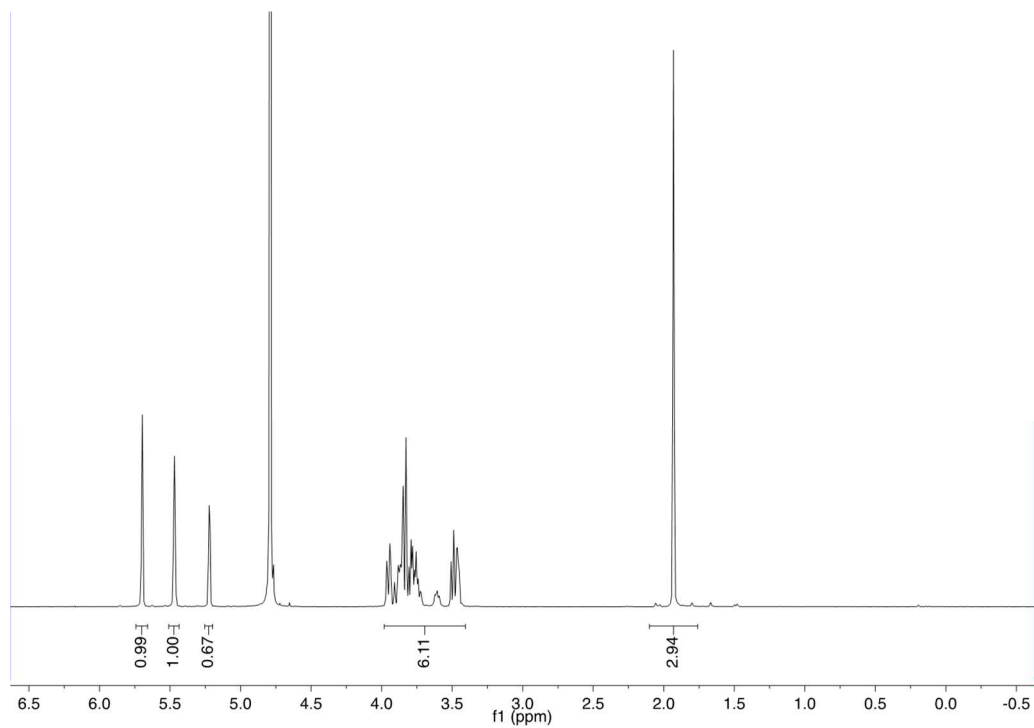

Figure S1.  $^1\text{H}$  NMR spectra of MAG.

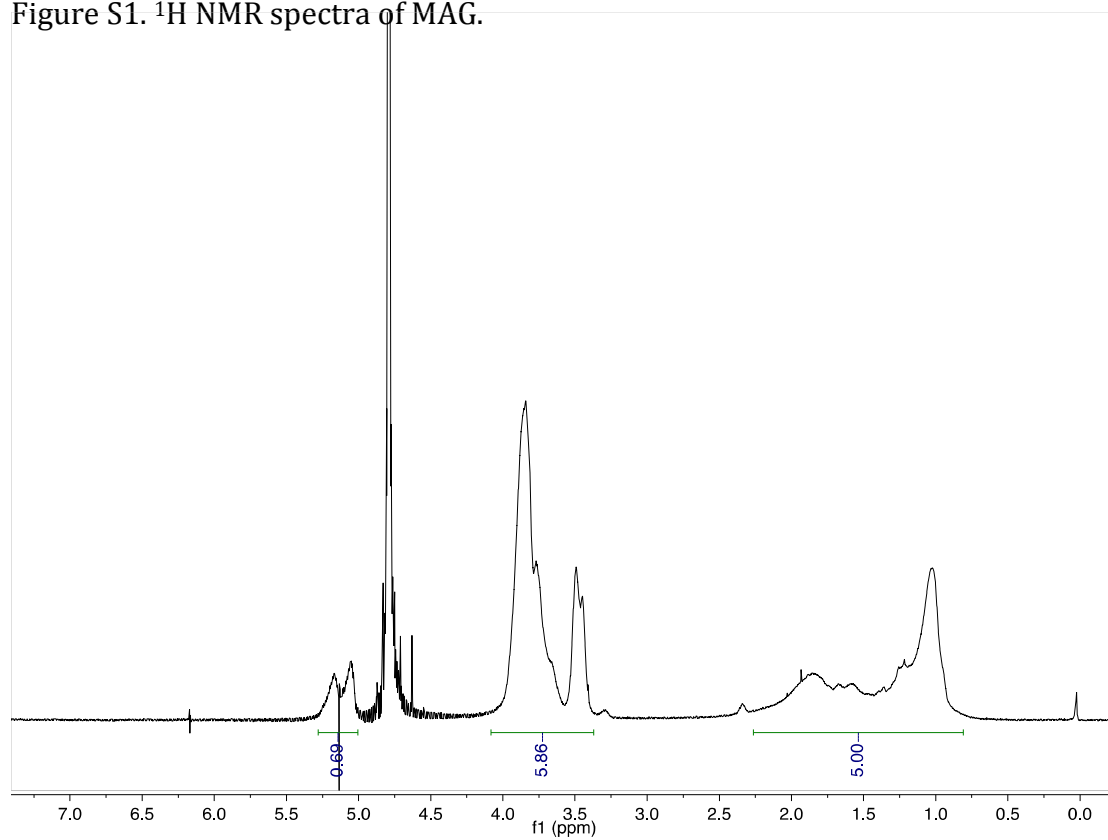

Figure S2.  $^1\text{H}$  NMR spectra of poly( $\text{G}_{46}$ )

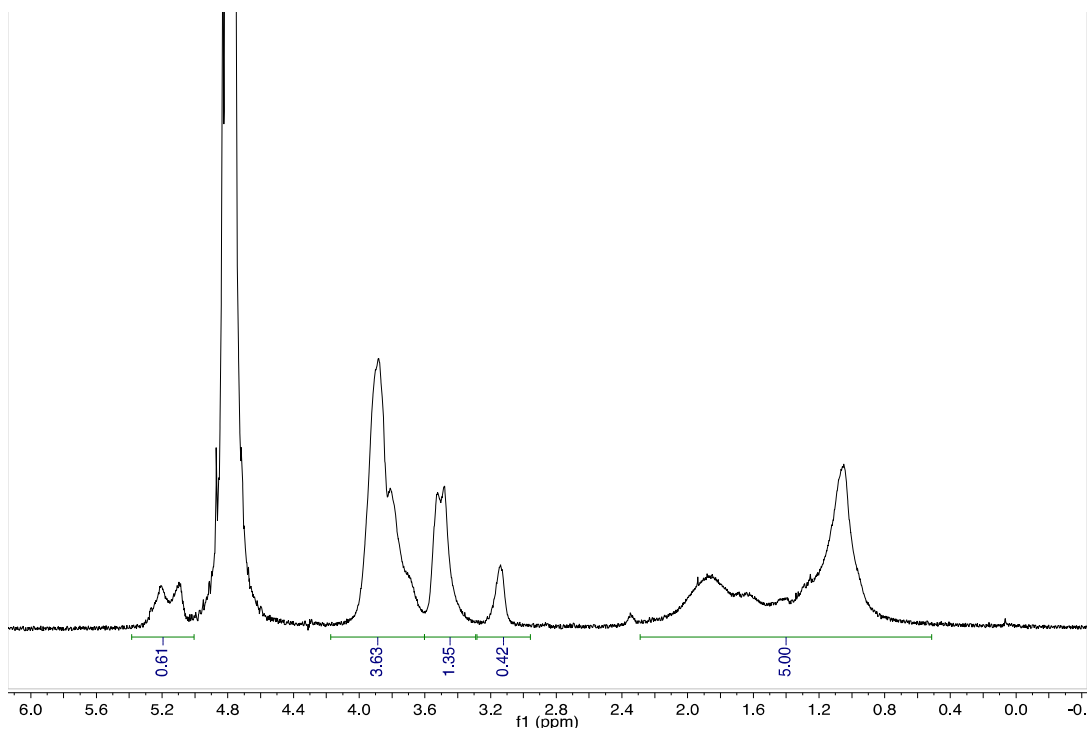

Figure S3. <sup>1</sup>H NMR spectra of poly(G<sub>46</sub>-b-P<sub>13</sub>)

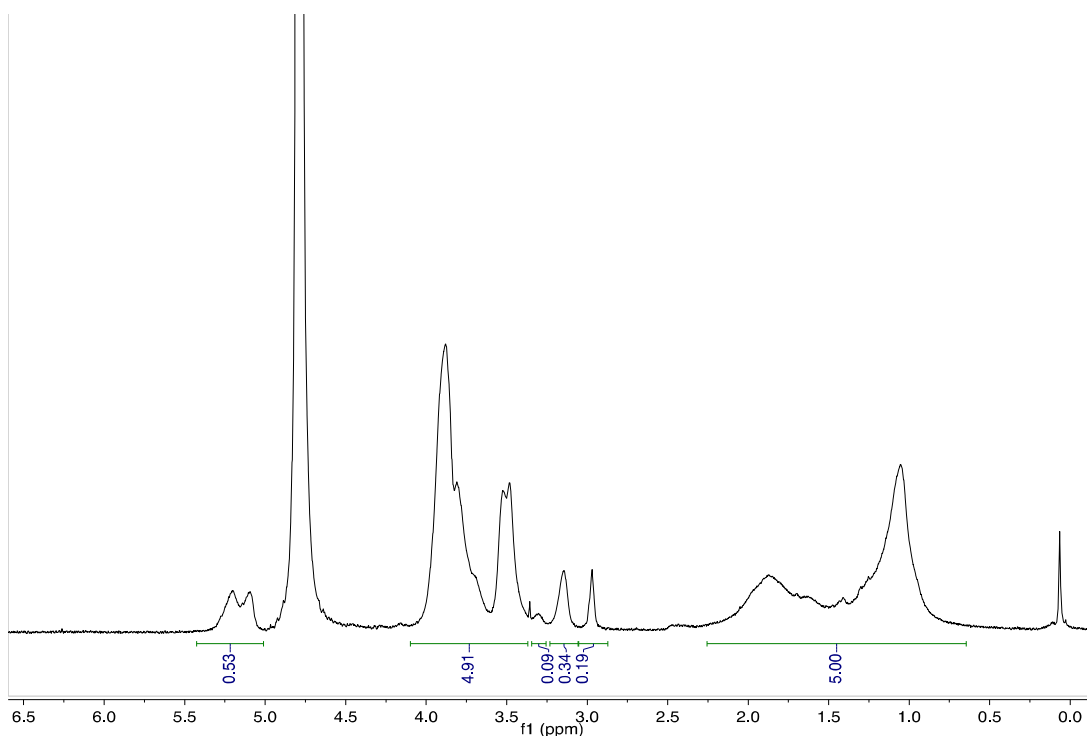

Figure S4. <sup>1</sup>H NMR spectra of poly(G<sub>46</sub>-b-P<sub>10</sub>-b-T<sub>2</sub>)

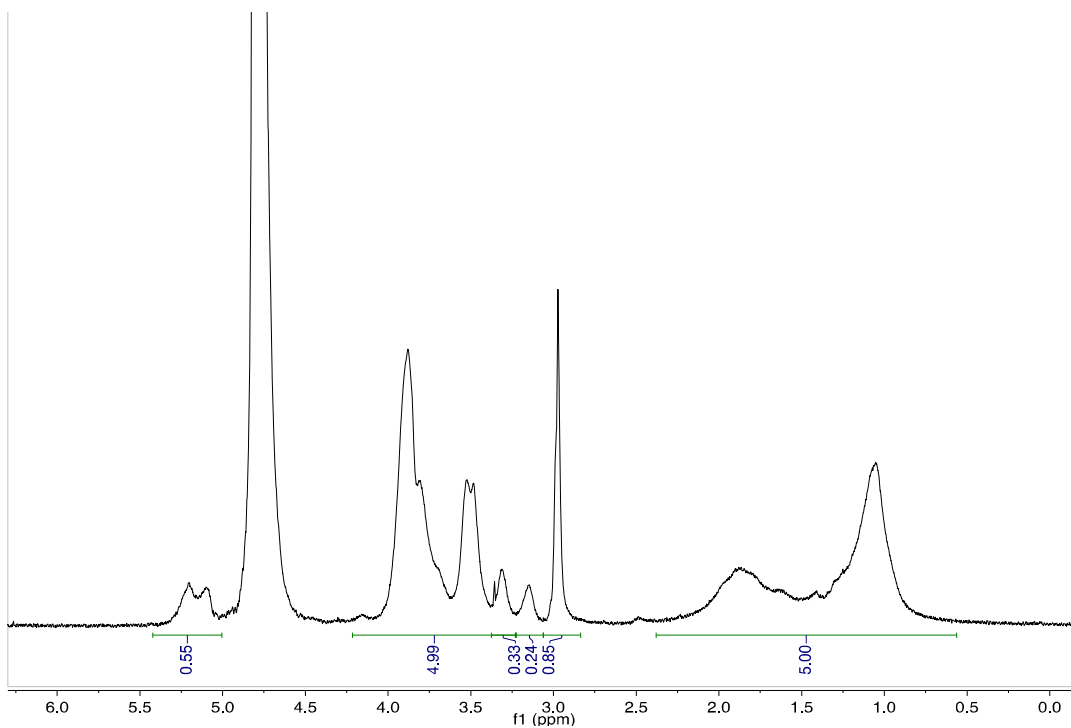

Figure S5. <sup>1</sup>H NMR spectra of poly(G<sub>46</sub>-b-P<sub>8</sub>-b-T<sub>9</sub>)

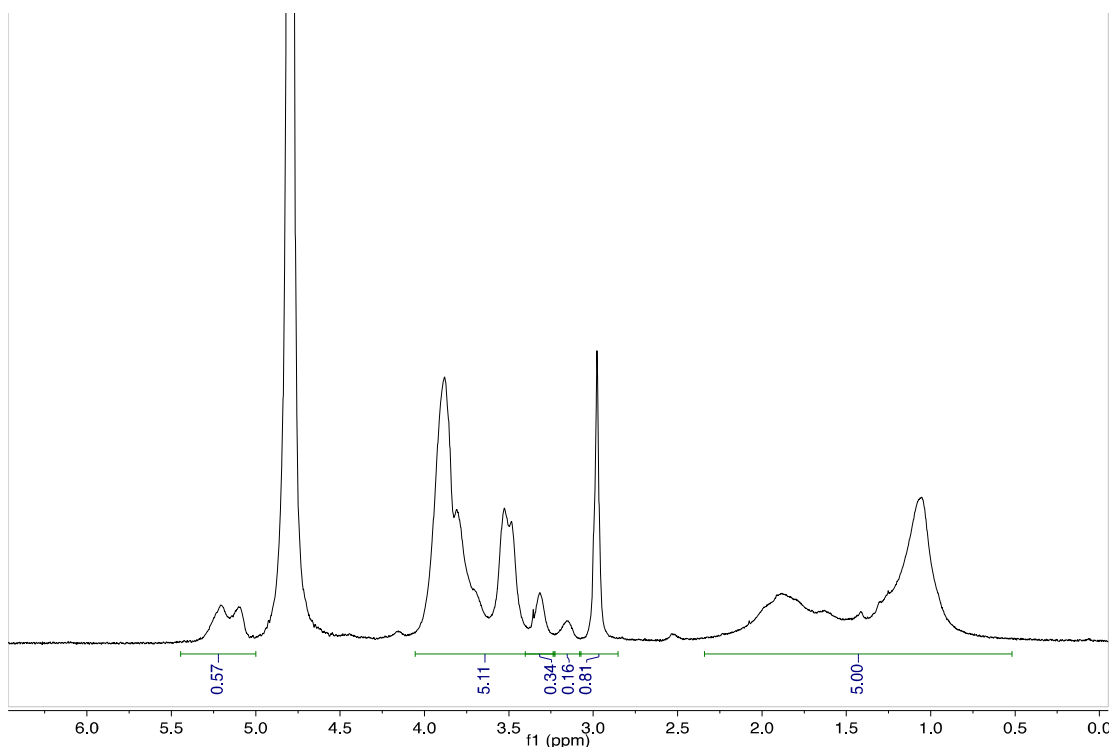

Figure S6. <sup>1</sup>H NMR spectra of poly(G<sub>46</sub>-b-P<sub>6</sub>-b-T<sub>17</sub>)

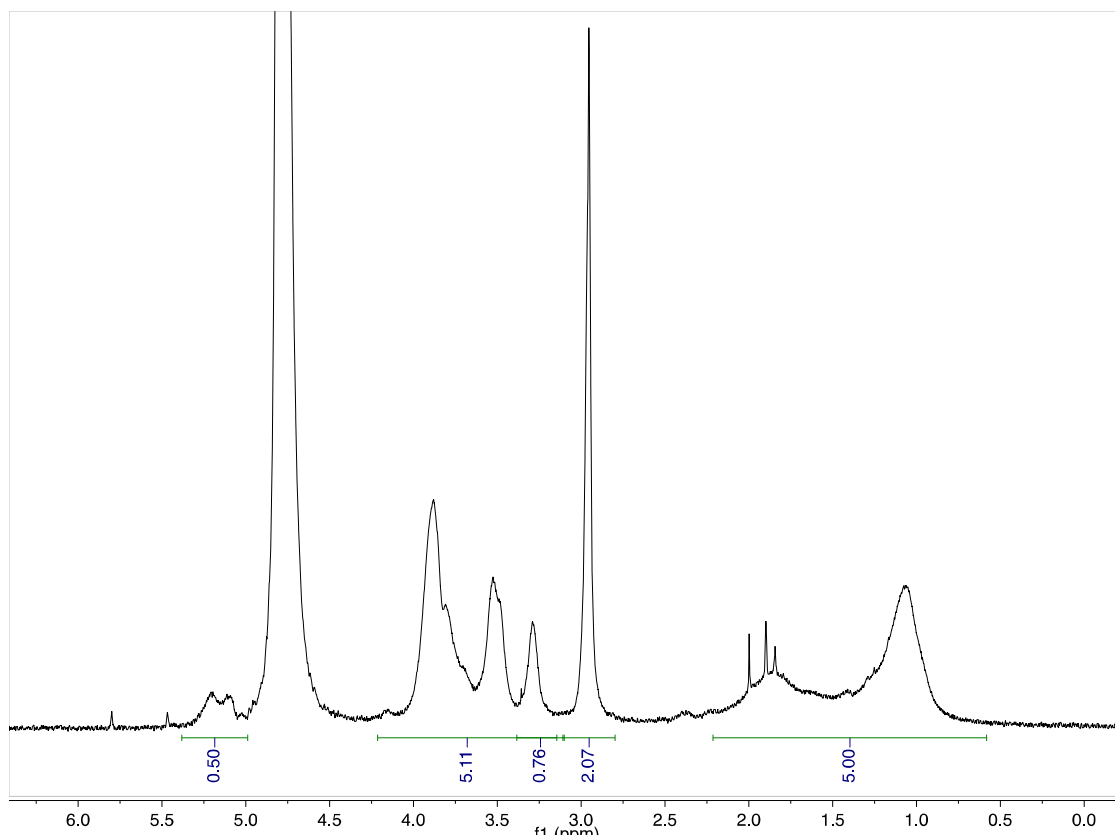

Figure S7. <sup>1</sup>H NMR spectra of poly(G<sub>46</sub>-b-T<sub>26</sub>)

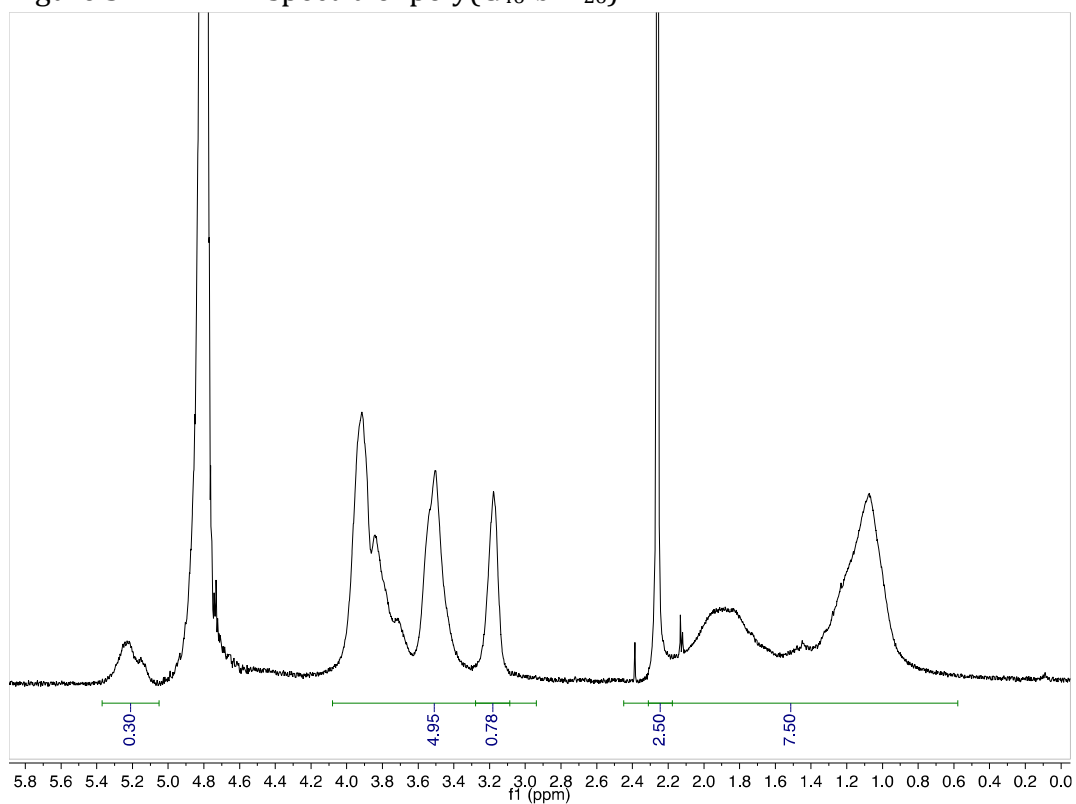

Figure S8. <sup>1</sup>H NMR spectra of poly(G<sub>45</sub>-S-P<sub>35</sub>)

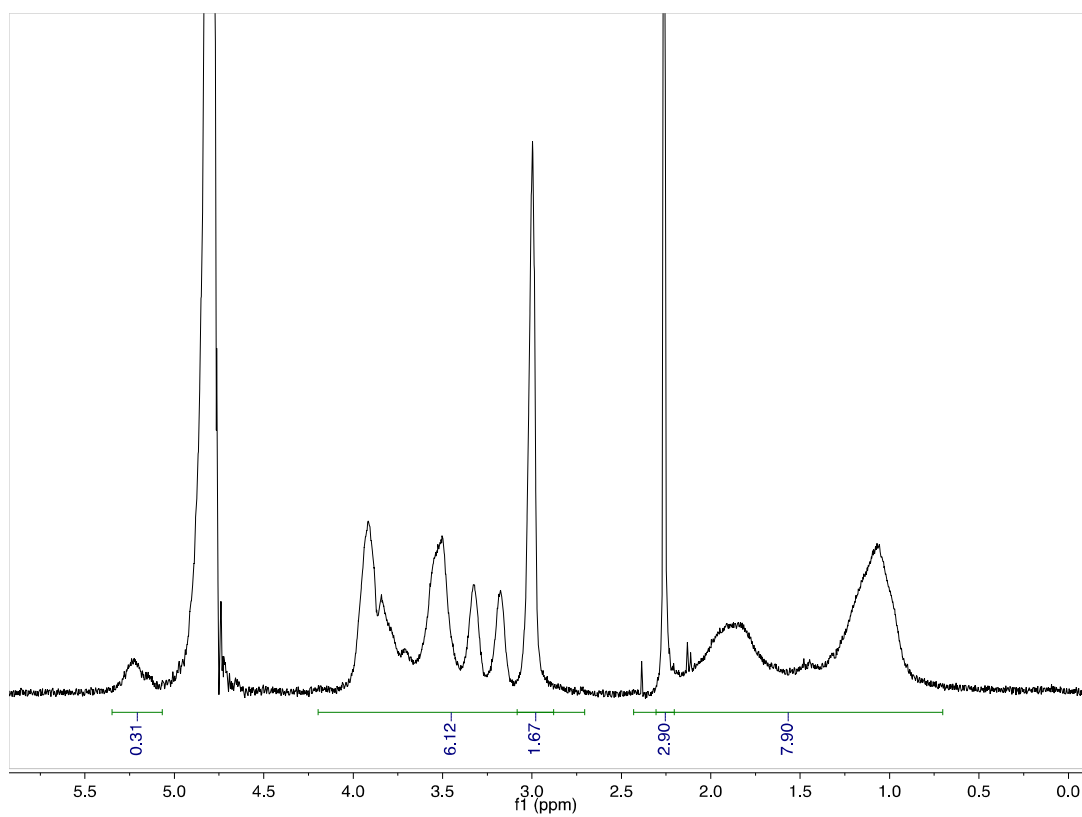

Figure S9. <sup>1</sup>H NMR spectra of poly(G<sub>62</sub>-s-T<sub>23</sub>)

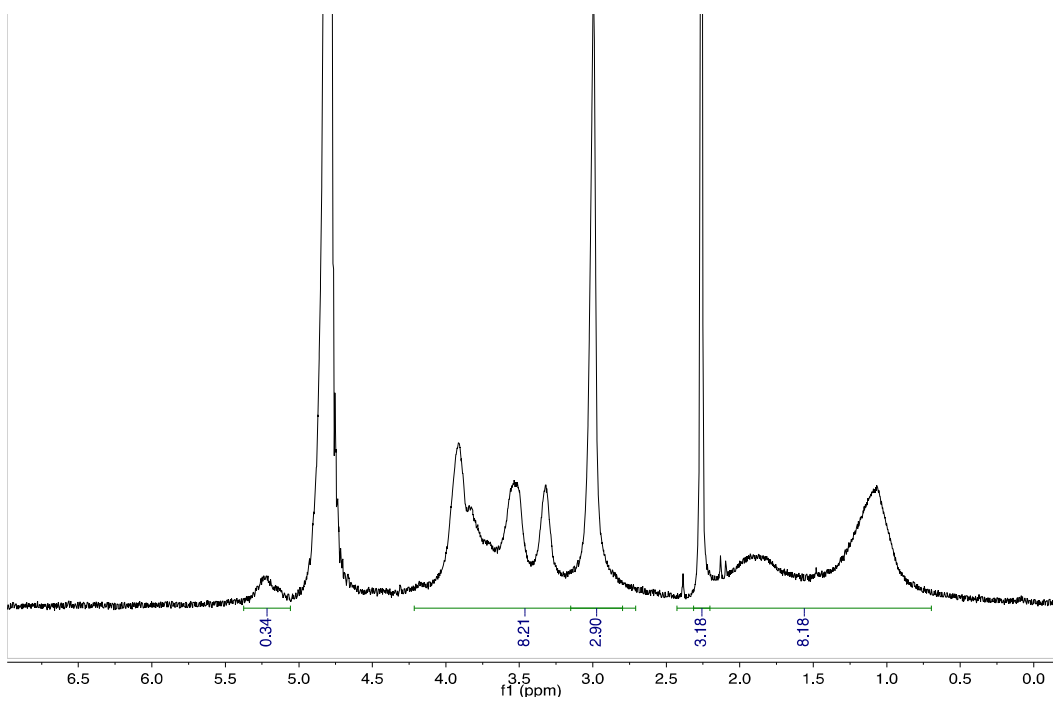

Figure S10. <sup>1</sup>H NMR spectra of poly(G<sub>32</sub>-s-P<sub>40</sub>-s-T<sub>21</sub>)

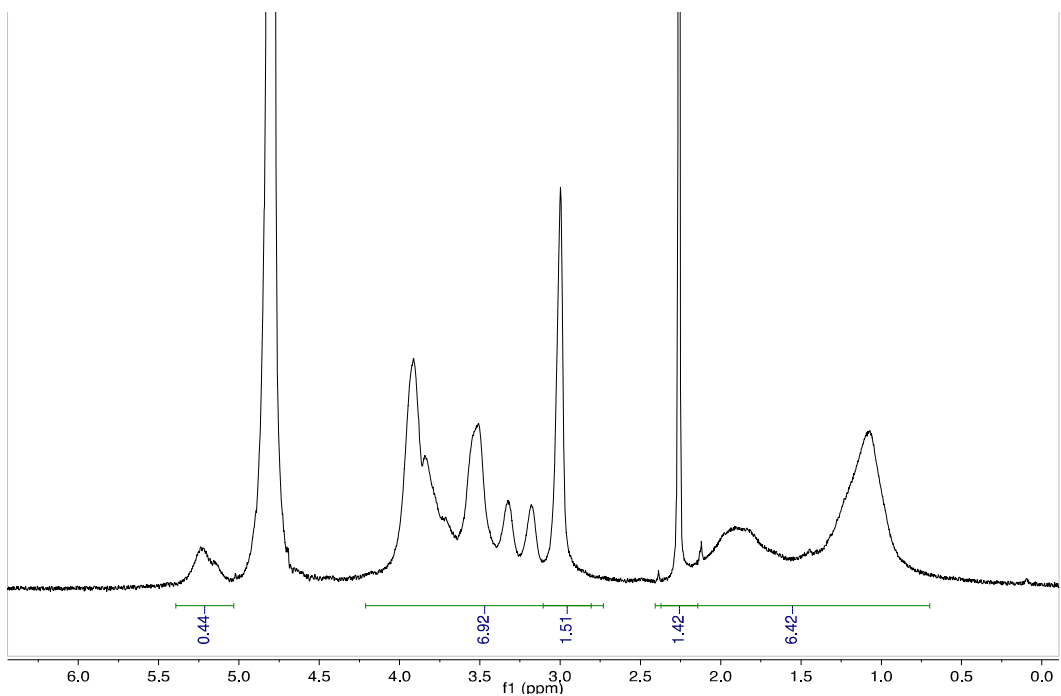

Figure S11. <sup>1</sup>H NMR spectra of poly(G<sub>47</sub>-S-P<sub>28</sub>-S-T<sub>18</sub>)

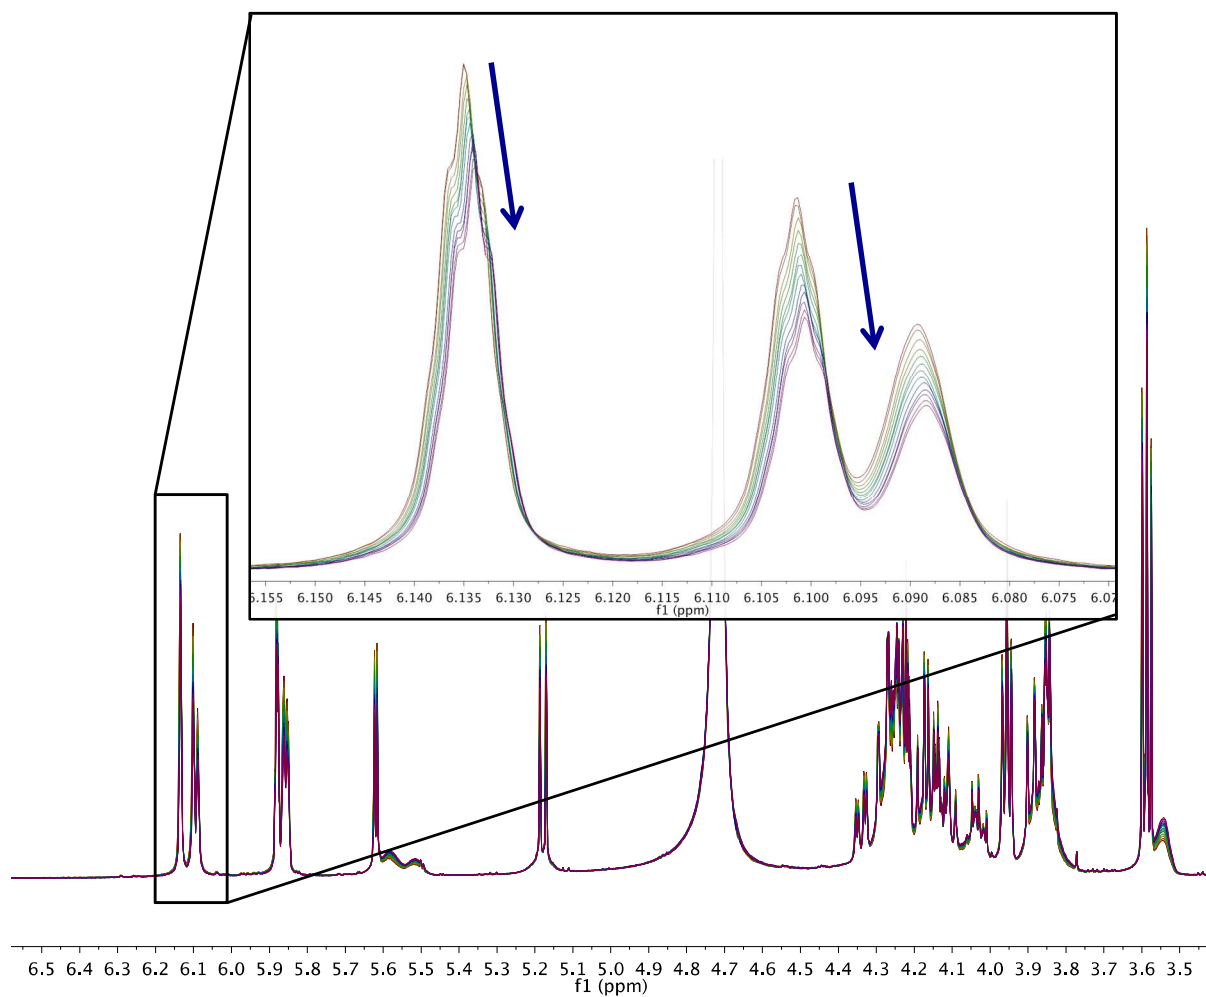

Figure S12. Overlays of <sup>1</sup>H NMR at 70 °C to monitor the consumption of two different monomers to find  $r_1$  and  $r_2$  in the reactivity ratio study. The monomers in this case were MAG and AEMA



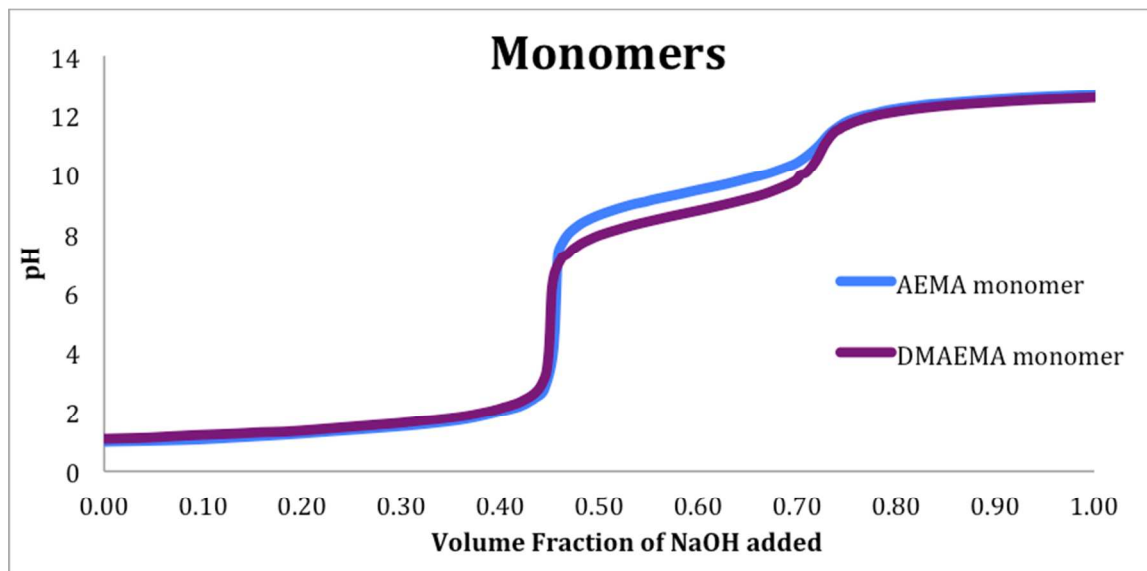

Figure S13. Comparison of the titration curves between AEMA and DMAEMA monomers.

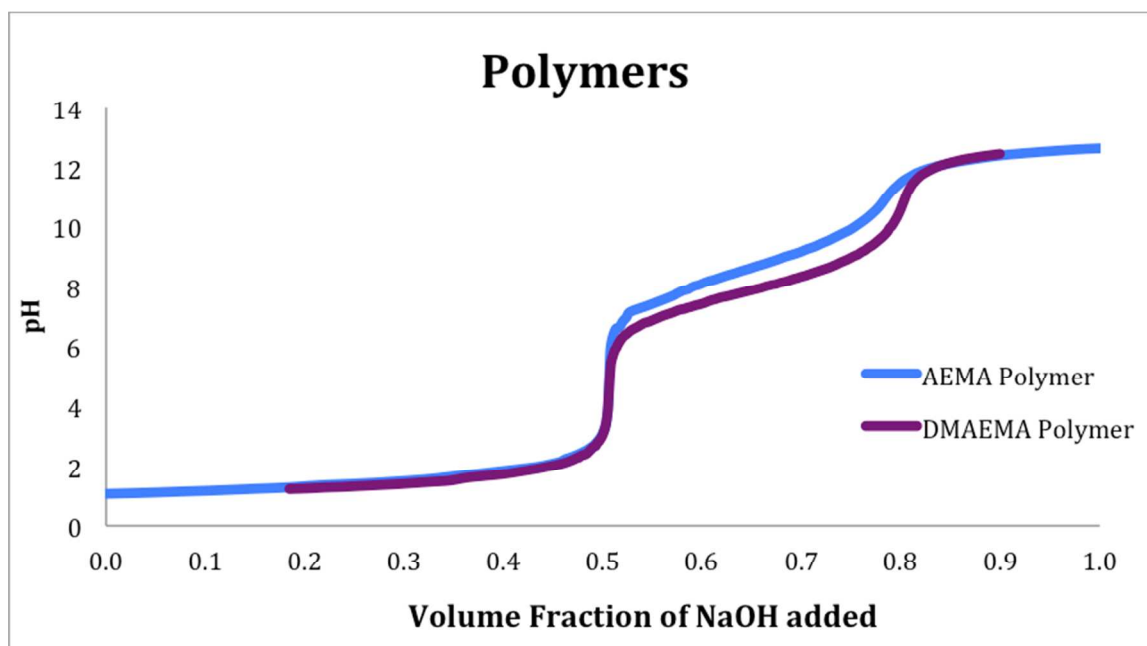

Figure S14. Comparison of the titration curves between AEMA and DMAEMA polymers.

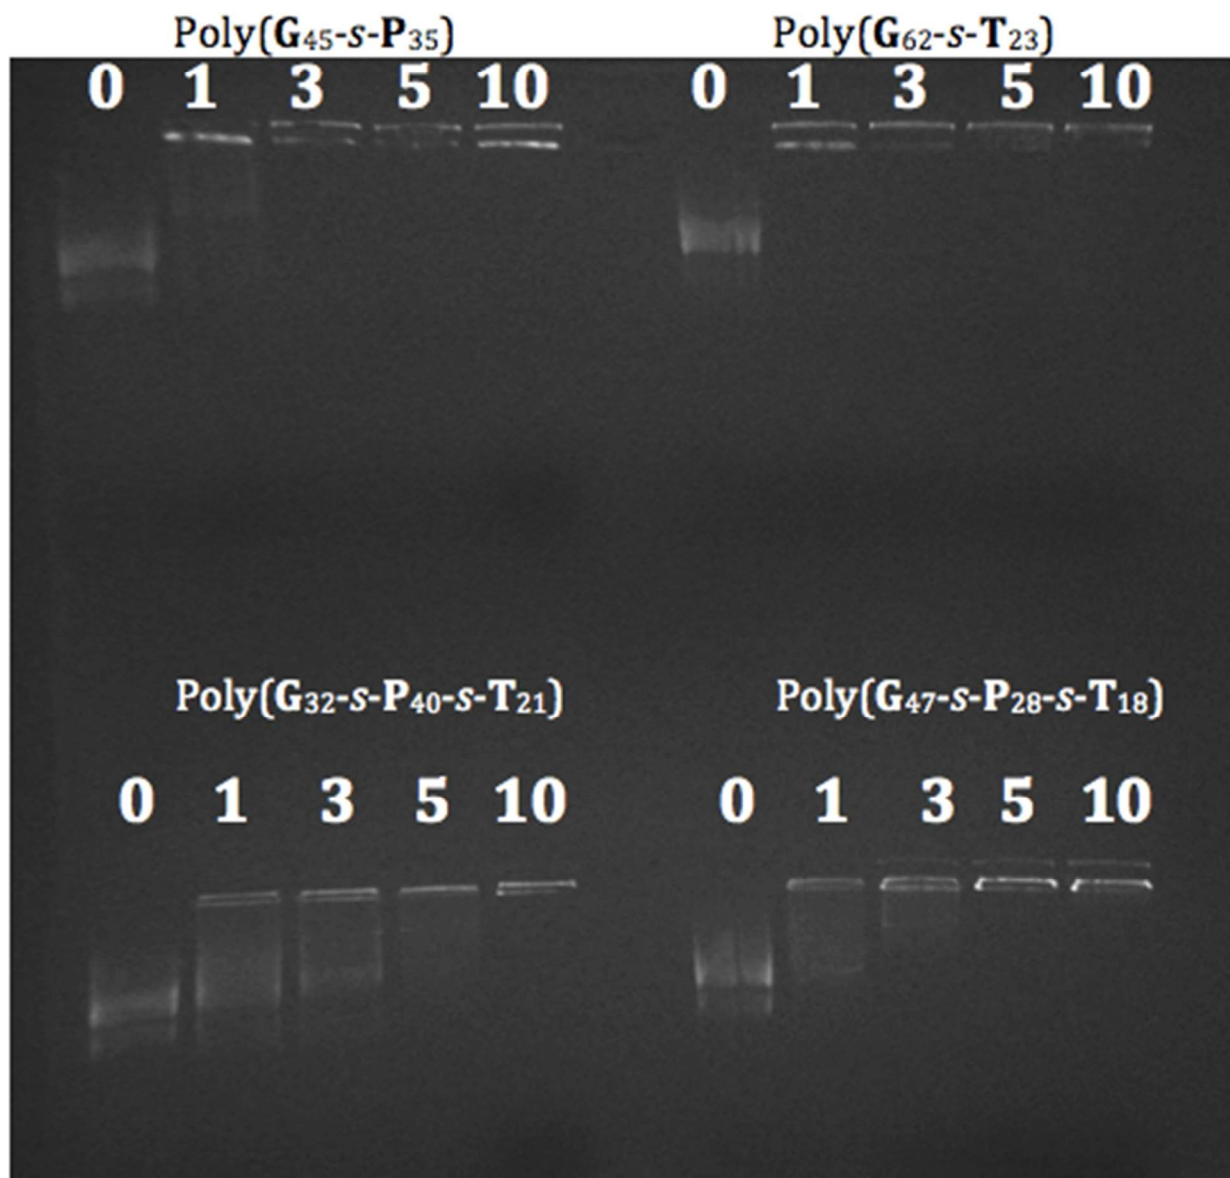

Figure S15. Gel Electrophoretic shift assay of the four statistical copolymers at N/P ratios 0, 1, 3, 5 and 10.

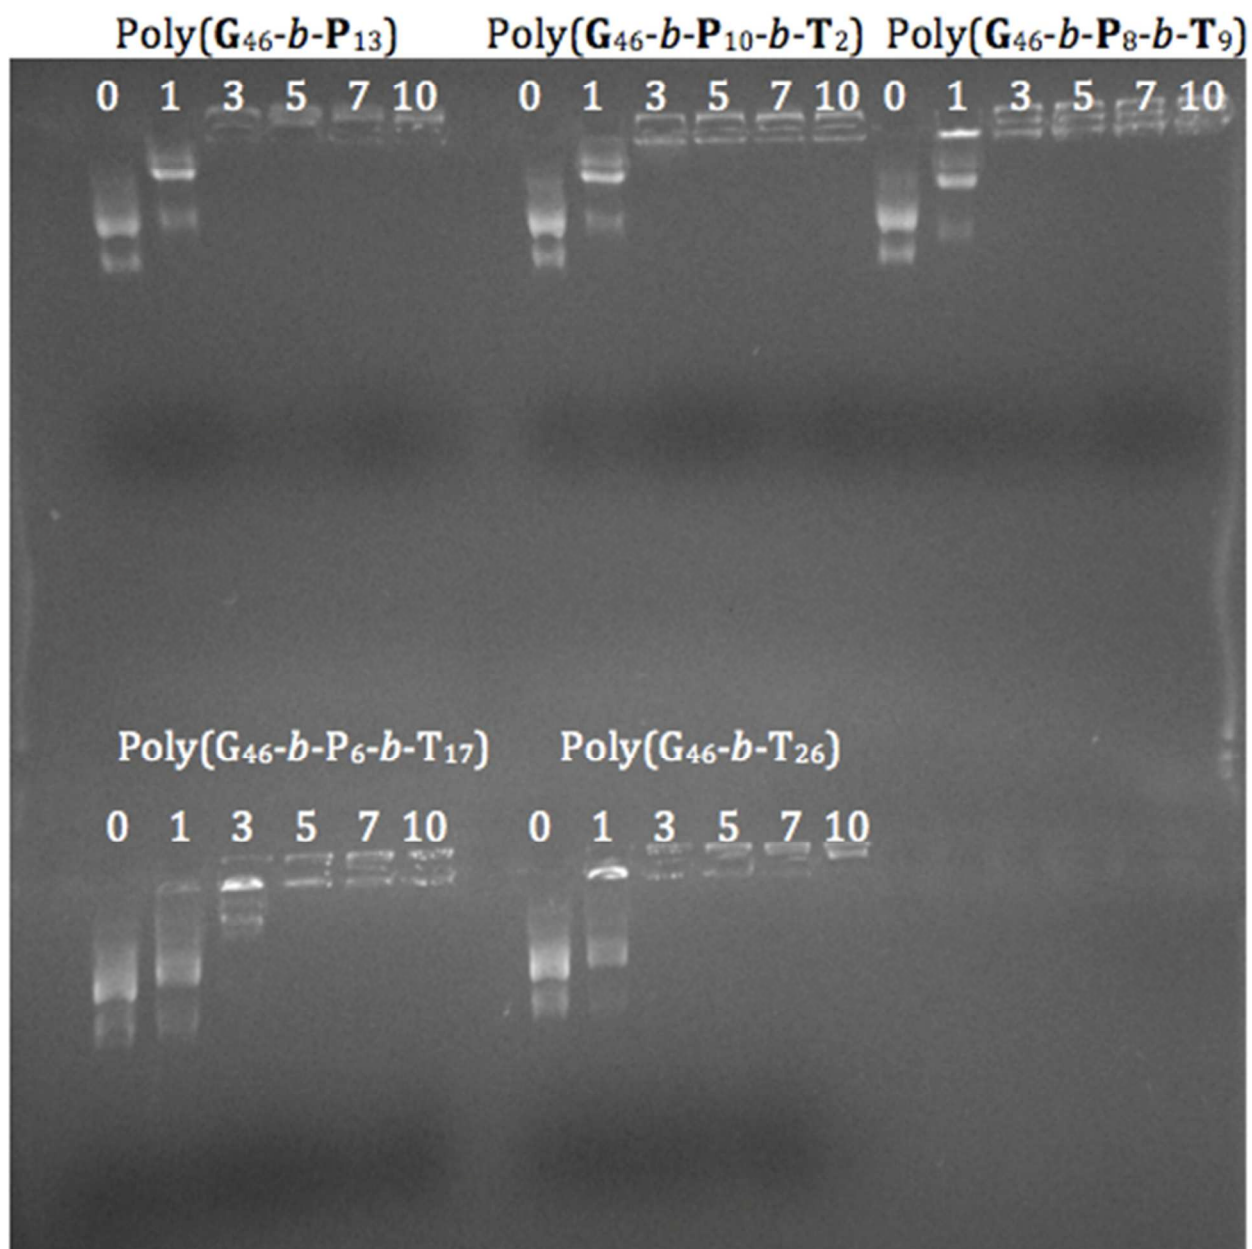

Figure S16. Gel Electrophoretic shift assay of the five block copolymers at N/P ratios 0, 1, 3, 5, 7 and 10.

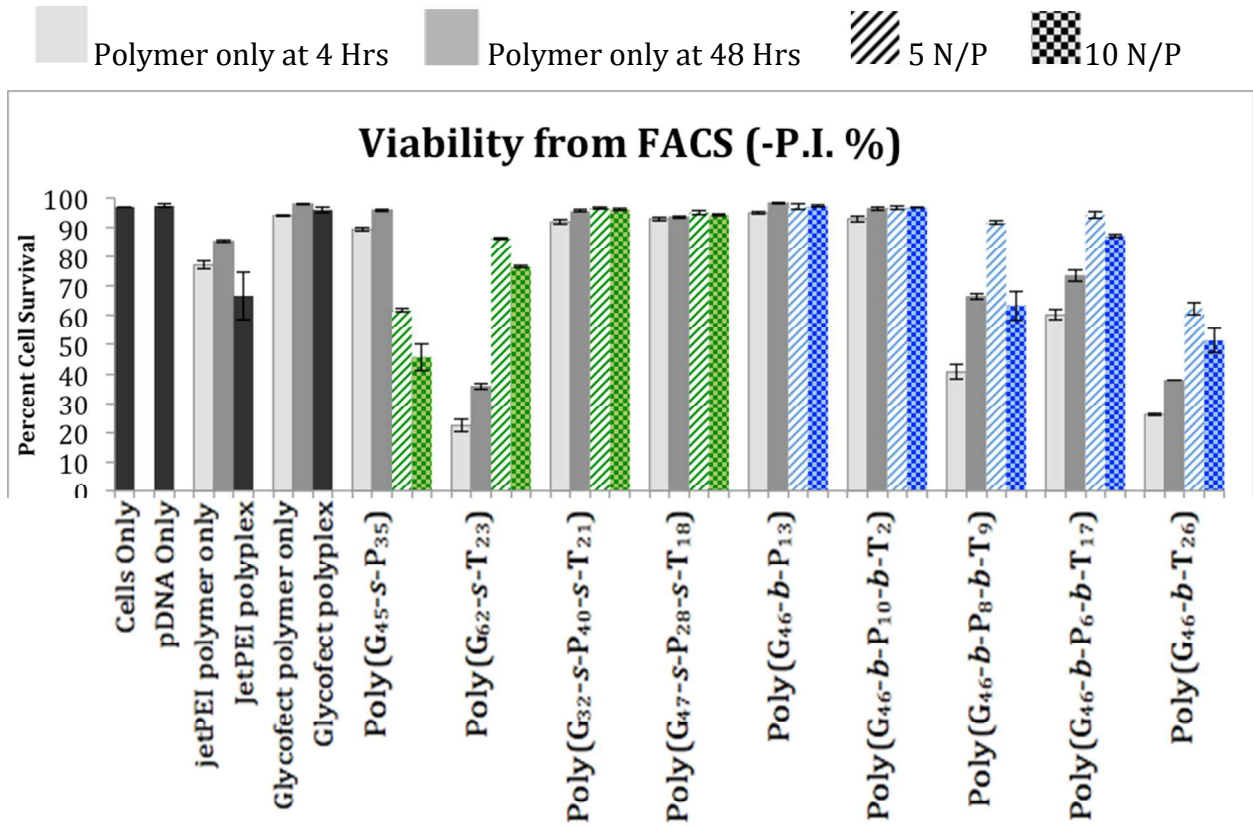

Figure S17. From Flow Cytometry – the percent cell survival according to negative propidium iodide staining of cells. Cells were treated with polymer only, and polyplexes at 5 N/P and 10 N/P. Polymer only samples were analyzed at 4 and 48 hours post transfection.

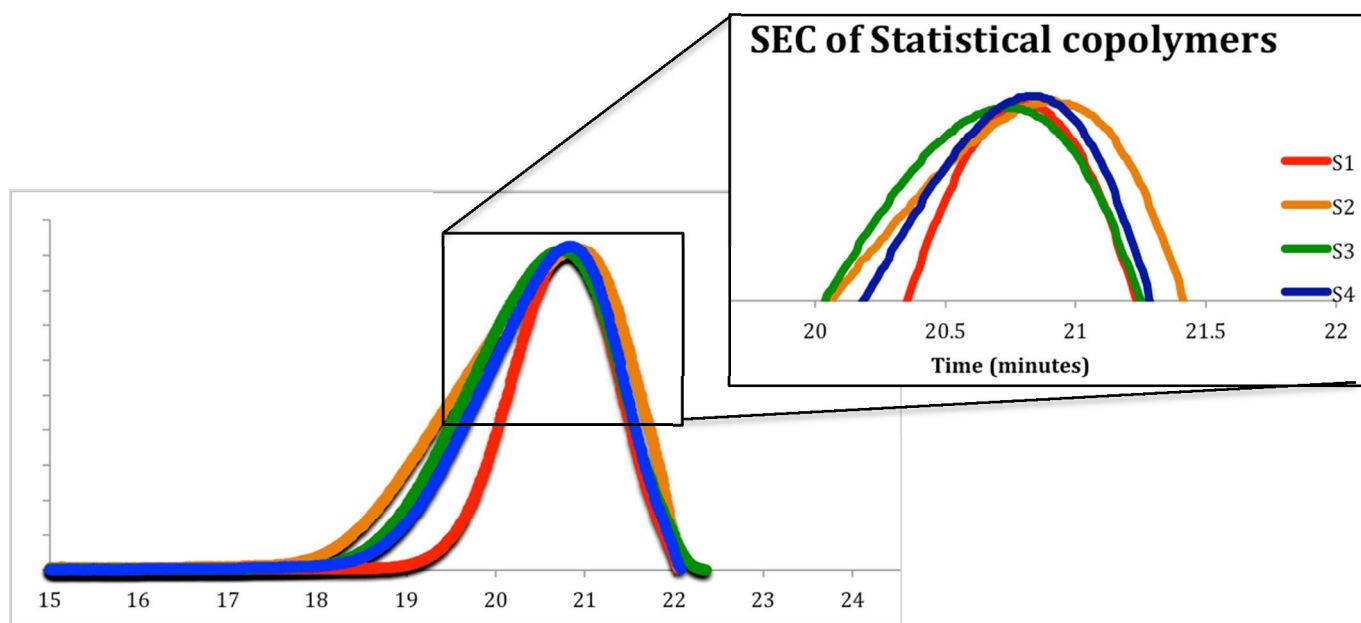

Figure S18.

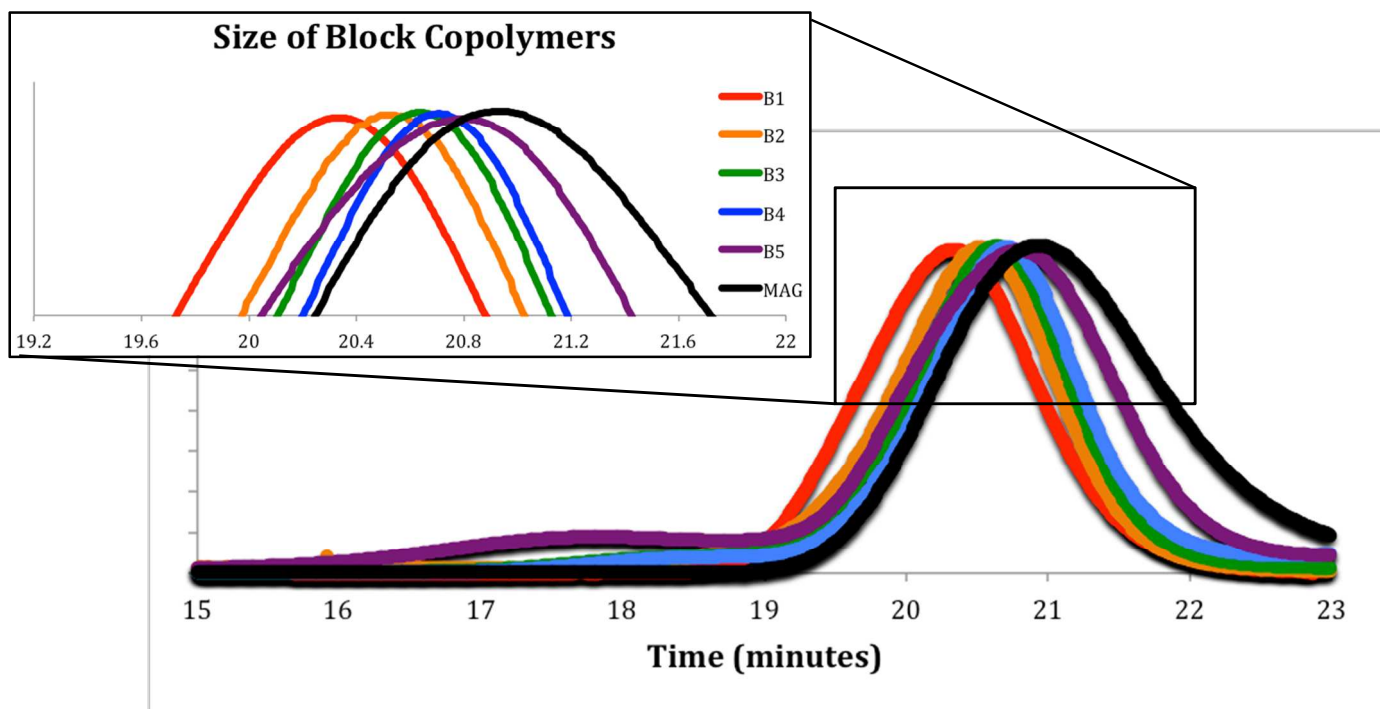

Figure S19.

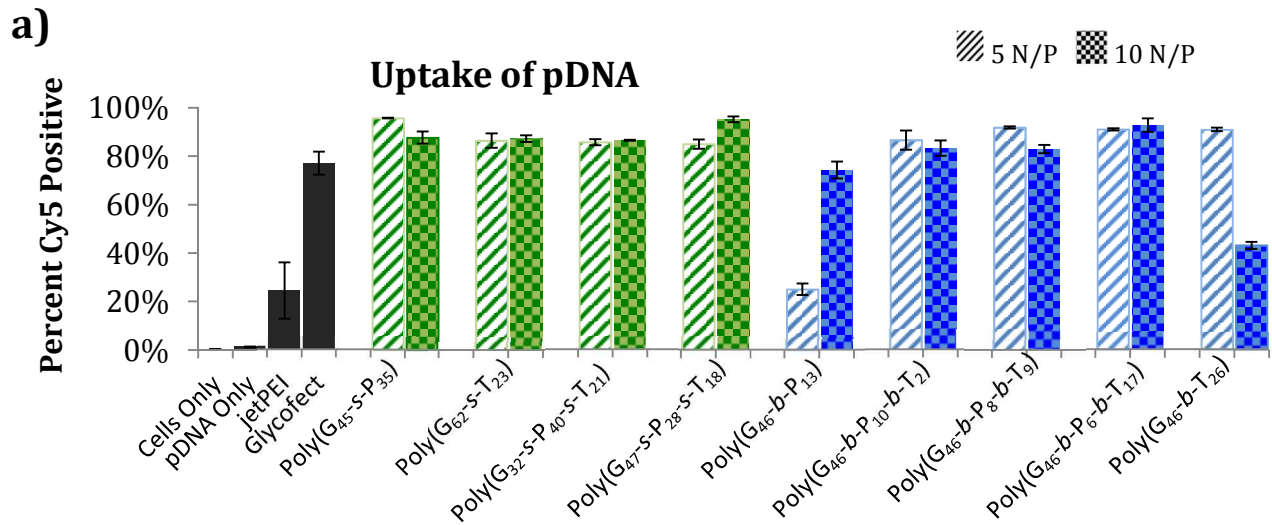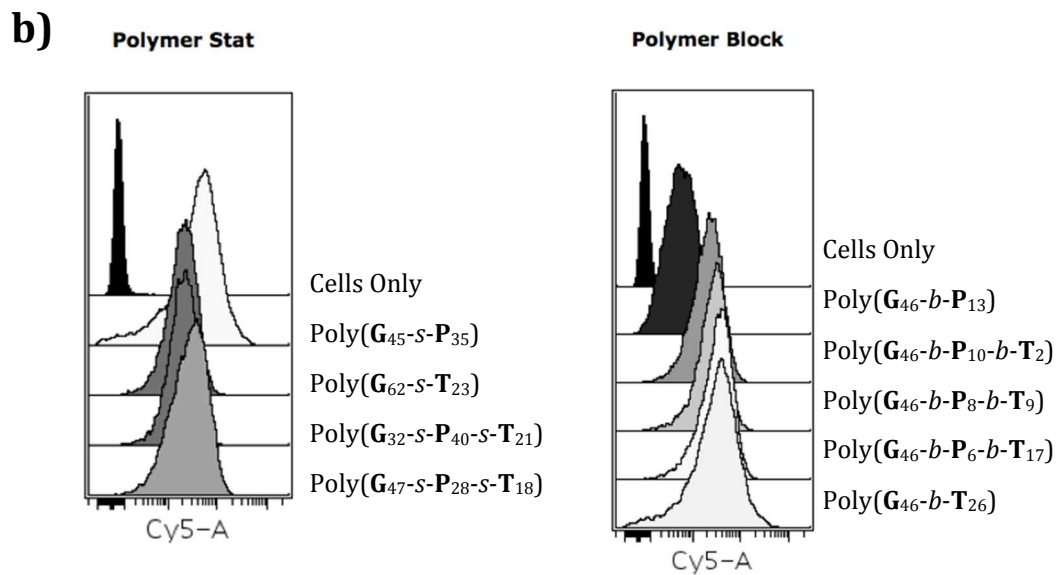

Figure S20. a) The amount of live cells that contain Cy-5 labeled pDNA and b) the intensity of the Cy-5 signal in cells transfected with polyplexes at 5 N/P. Cy5 represents the intensity of the Cy5 signal only in live cells – as determined by the negative population of propidium iodide.

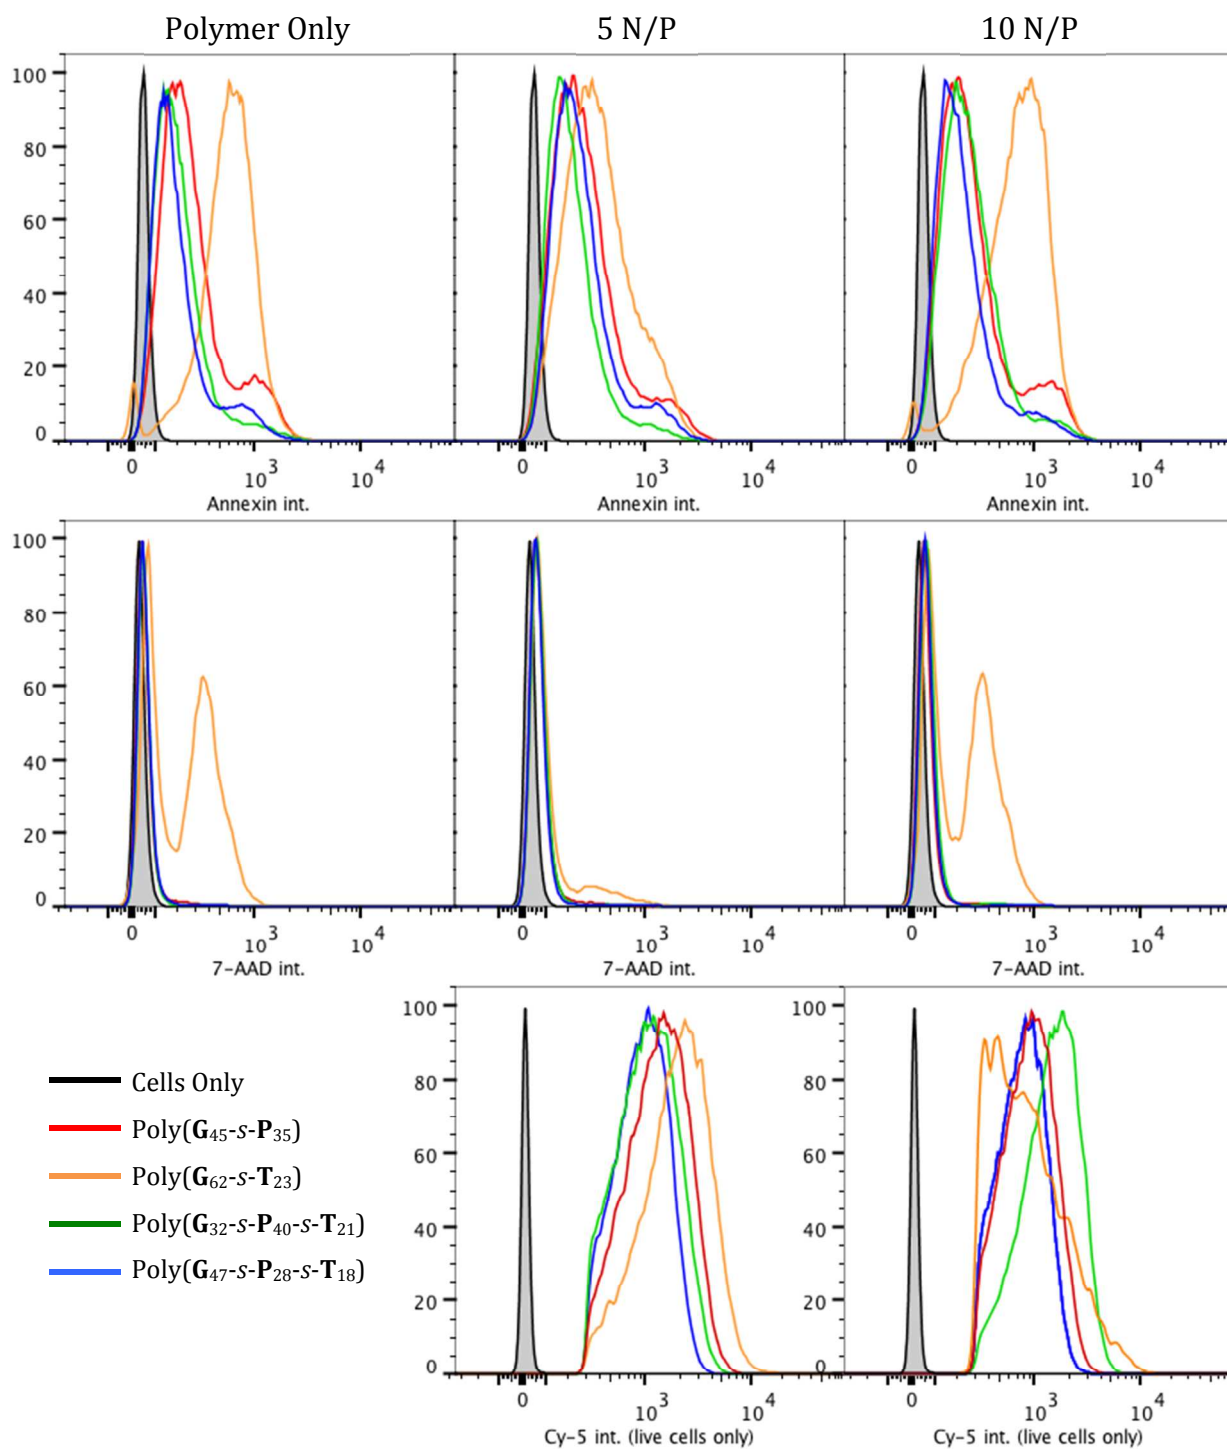

Figure S21. Normalized concatenated histogram overlays of the four statistical copolymers. The x-axis is Annexin V, 7-AAD, and Cy5 intensity for the rows and the columns are Polymer Only, 5 N/P, and 10 N/P, respectively. Cy5 represents the intensity of the Cy5 signal only in live cells – as determined by Annexin V negative population.

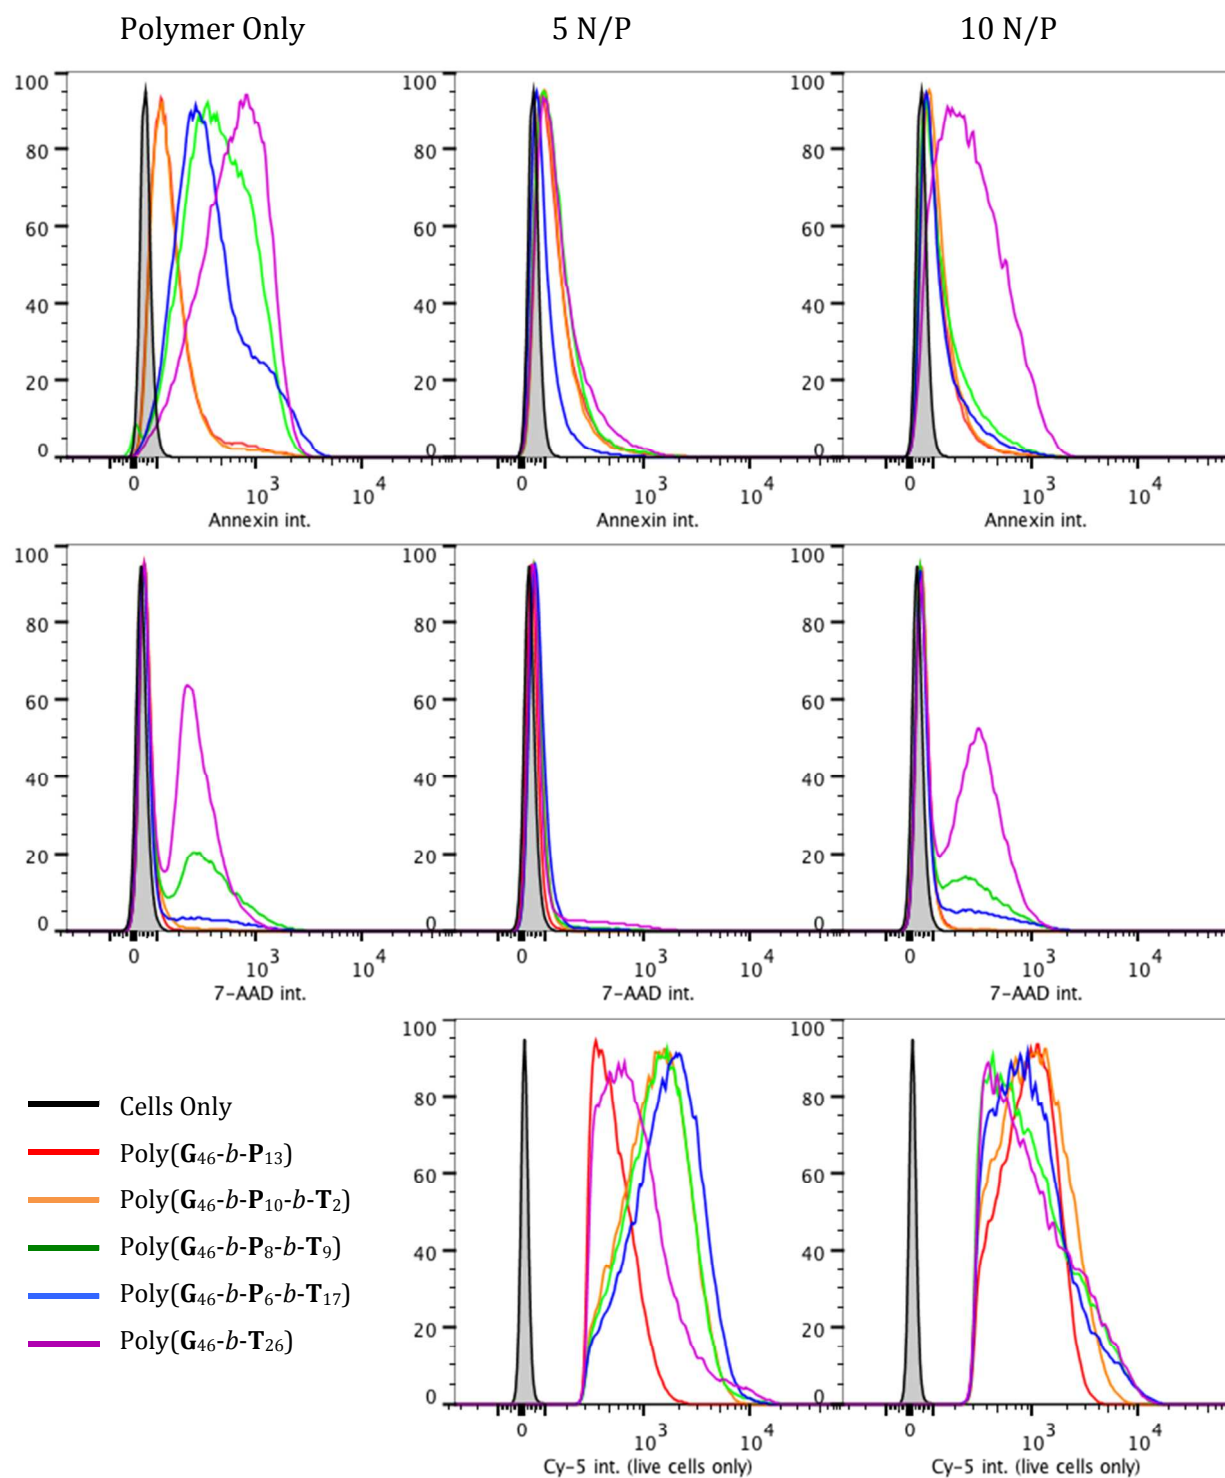

Figure S22. Normalized concatenated histogram overlays of the five block copolymers. The x-axis is Annexin V, 7-AAD, and Cy5 intensity for the rows and the columns are Polymer Only, 5 N/P, and 10 N/P, respectively. Cy5 represents the intensity of the Cy5 signal only in live cells – as determined by Annexin V negative population.



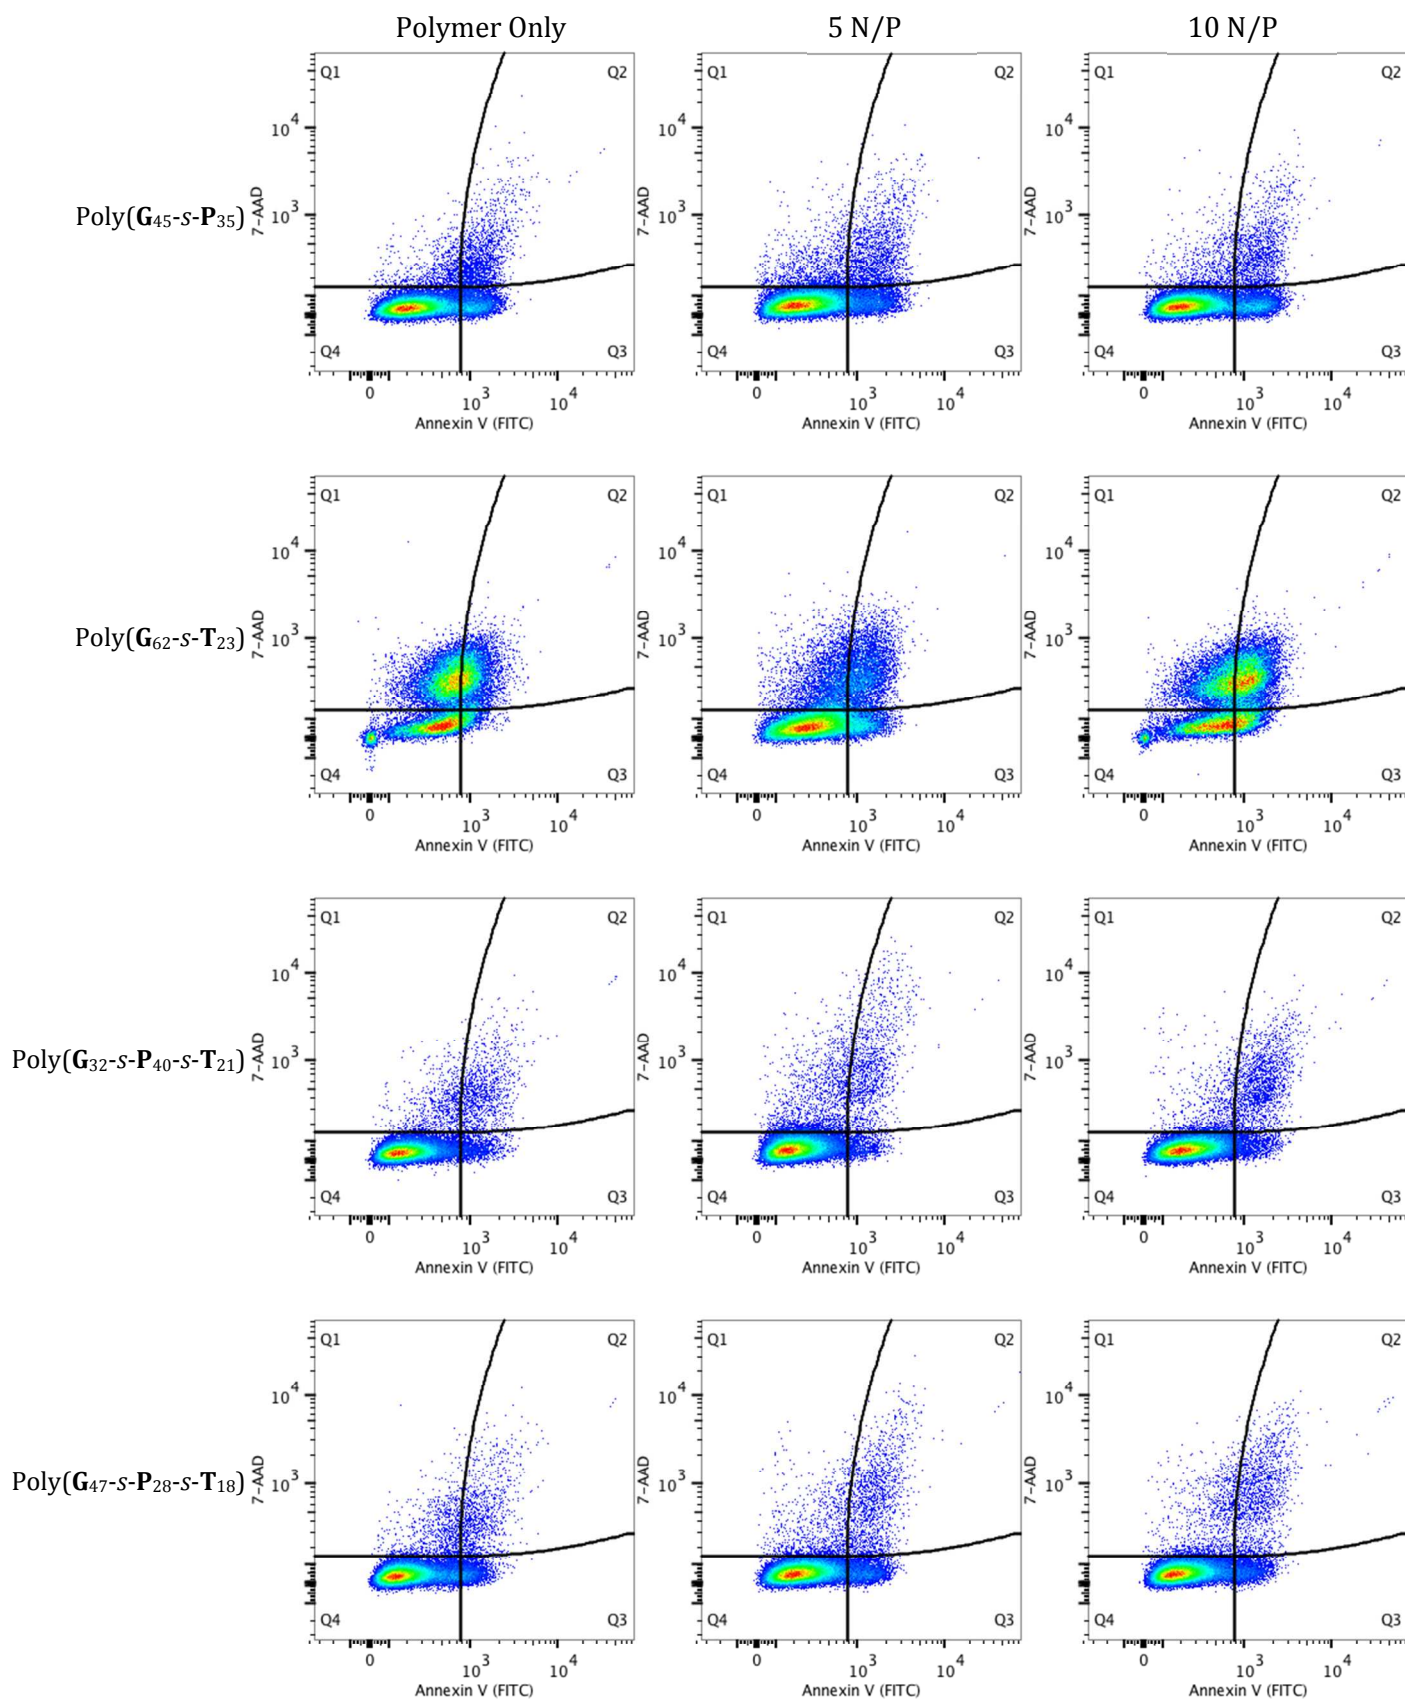

Figure S23. Flow cytometry data for the four statistical copolymers. Triplicate sample was concatenated into one file. The x-axis is the Annexin V (FITC) stain, the y-axis is the 7-AAD stain, and the columns represent the Polymer only, 5 N/P, and the 10 N/P samples.

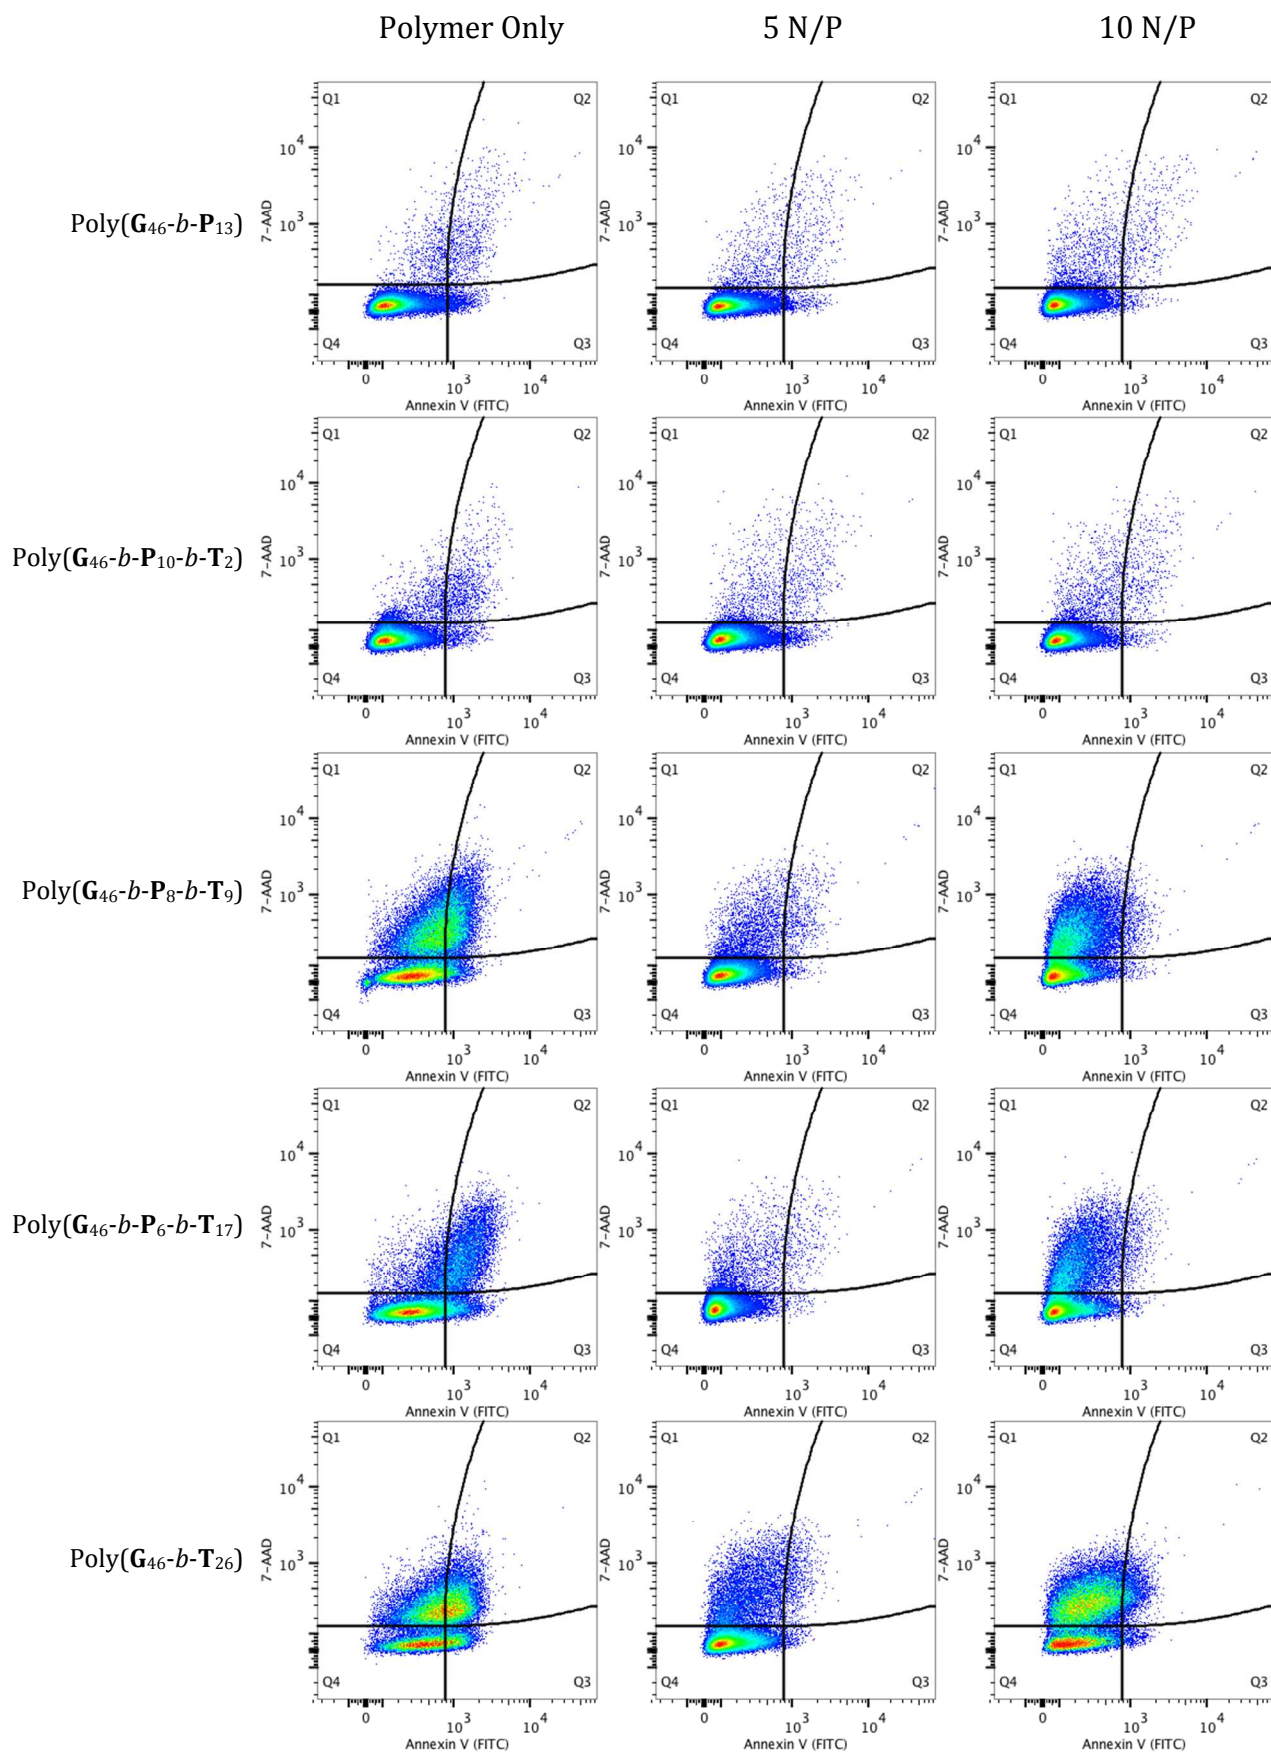

Figure S24. Flow cytometry data for the five block copolymers. Triplicate sample was concatenated into one file. The x-axis is the Annexin V (FITC) stain, the y-axis is the 7-AAD stain, and the columns represent the Polymer only, 5 N/P, and the 10 N/P samples.

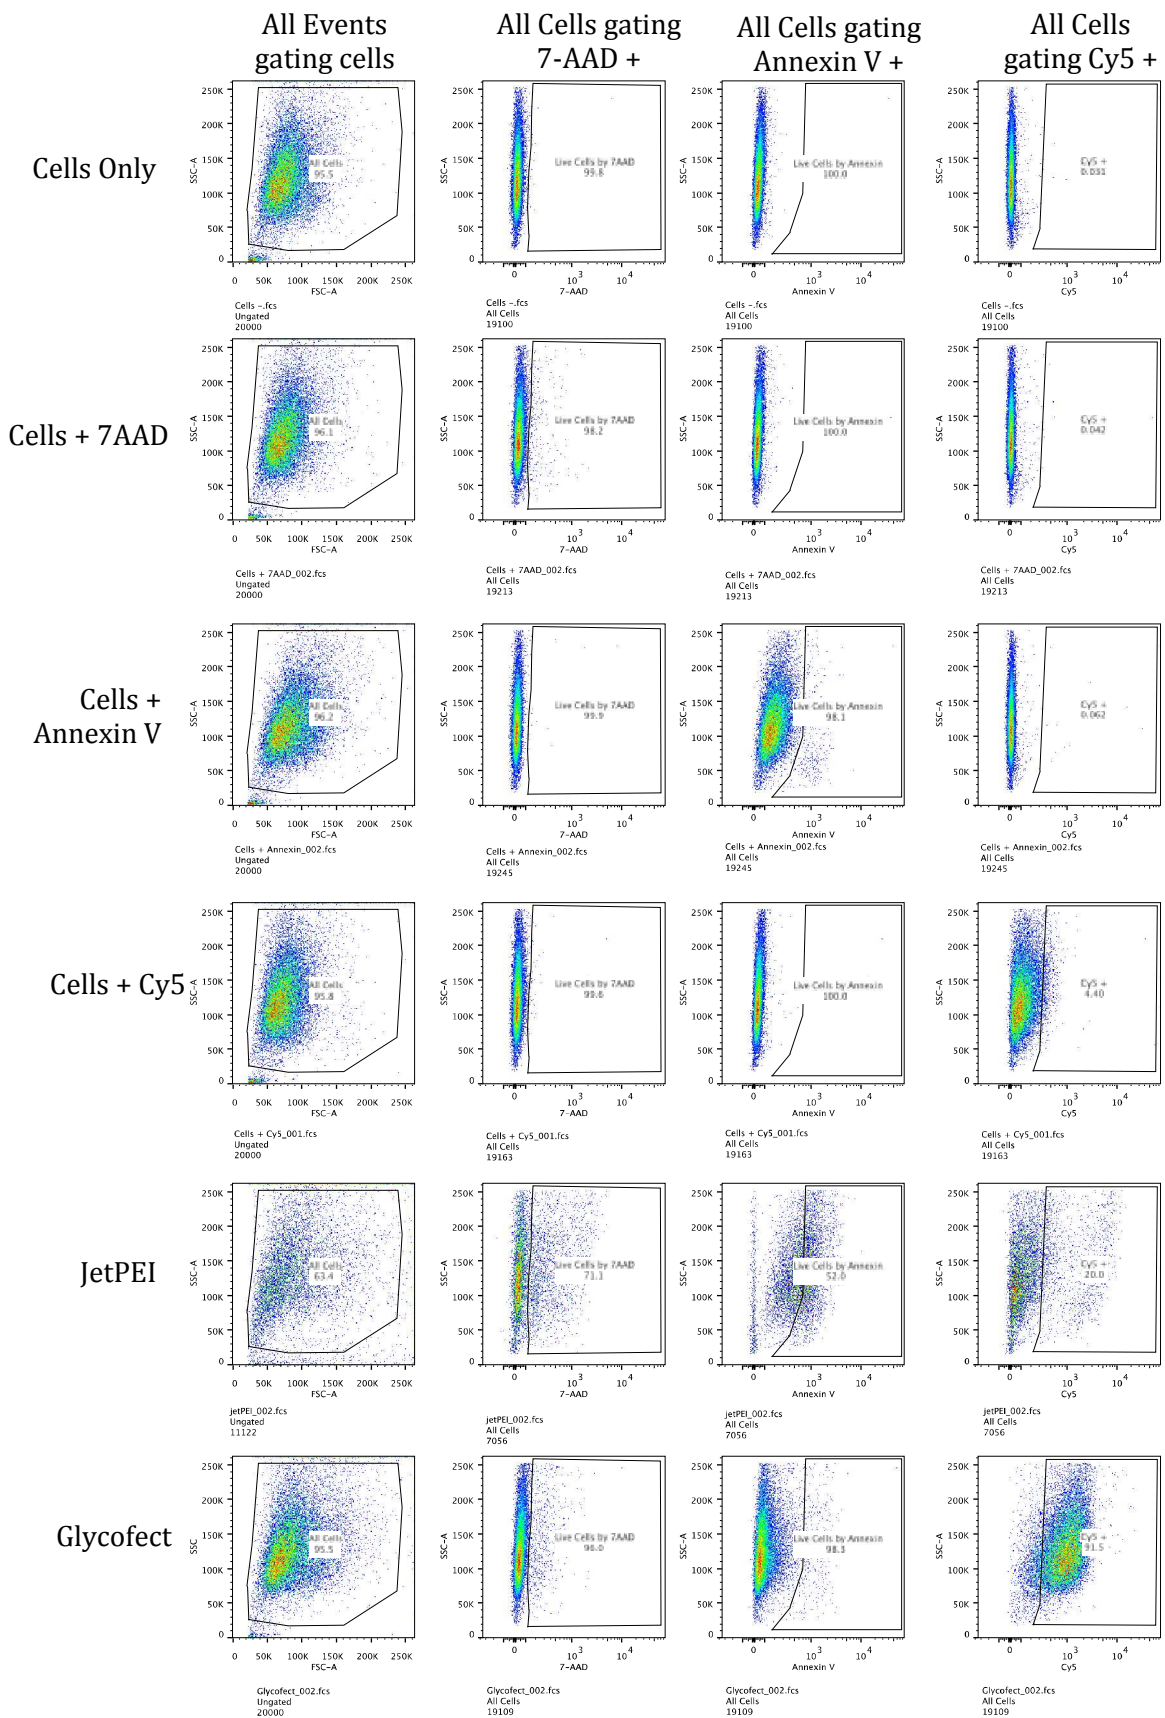

Figure S25a. Gating hierarchy and controls for flow cytometry data.

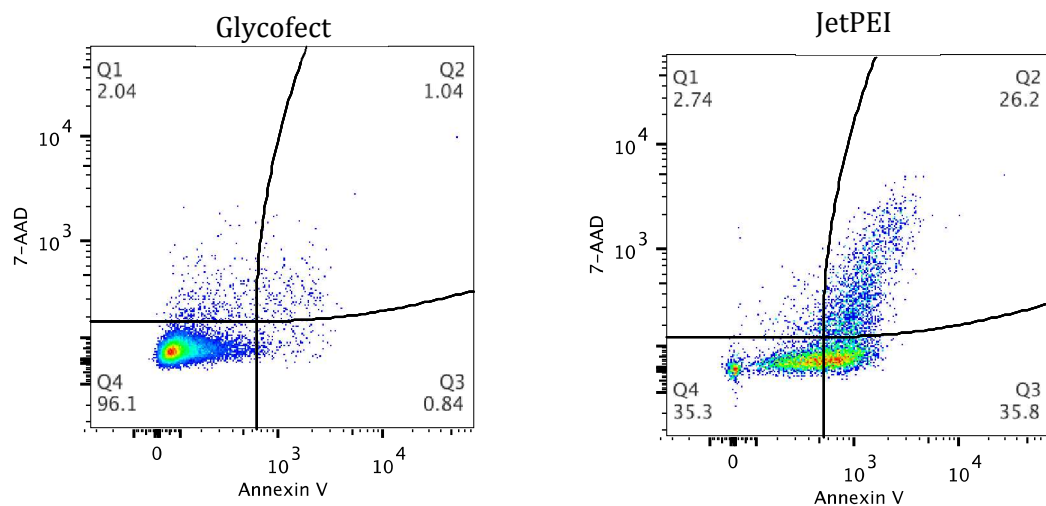

Figure S25b. Controls Glycofect and JetPEI from flow cytometry data. The x-axis is the Annexin V (FITC) stain, the y-axis is the 7-AAD stain

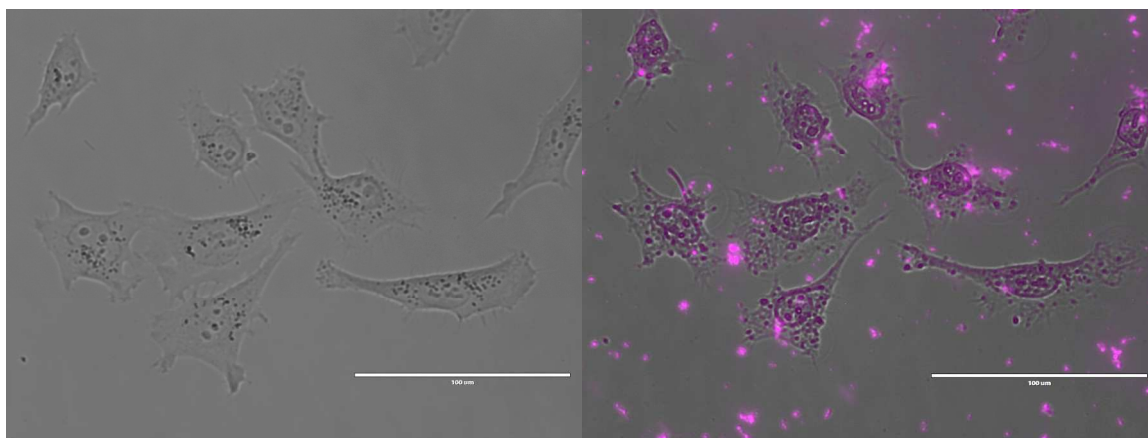

Figure S26. Microscopy images taken of the cells before Cy-5 labeled JetPEI polyplexes were added and four hours post transfection. Purple overlay is fluorescence microscopy taken at 679 nm. Scale bar represents 100  $\mu\text{m}$ .

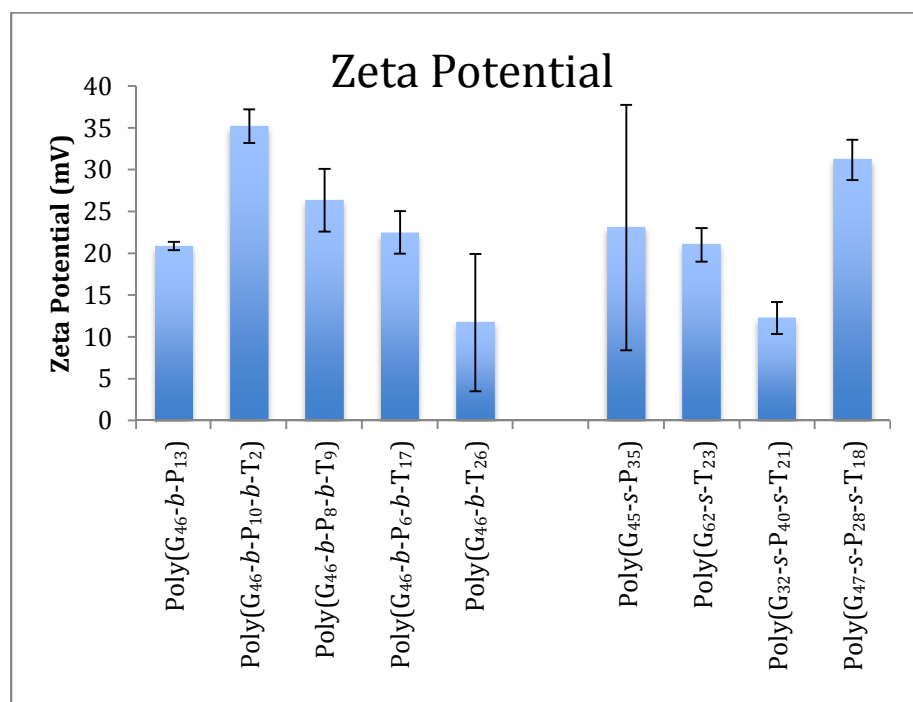

Figure S27: The zeta potential of the formulated polyplexes at 10 N/P diluted in water. Standard deviation was taken from three separate  $\zeta$  measurements. All formulations had a positive zeta value.

Table S28. The size of the polyplexes measured by DLS, polyplexes were formed in water and then added to opti-MEM and size was measured at 0, 2, 4, and 6 hours.

| <b>Polymer</b>                                                | <b>N/P</b> | <b>0 Hour</b> | <b>2 Hours</b> | <b>4 Hours</b> | <b>6 Hours</b> | <b>6 Hr in H<sub>2</sub>O</b> |
|---------------------------------------------------------------|------------|---------------|----------------|----------------|----------------|-------------------------------|
| <b>Poly(G<sub>45</sub>-S-P<sub>35</sub>)</b>                  | 5          | 221           | 806            | 1200           | 1485           | 78                            |
|                                                               | 10         | 176           | 491            | 871            | 1121           | 59                            |
| <b>Poly(G<sub>62</sub>-S-T<sub>23</sub>)</b>                  | 5          | 170           | 410            | 563            | 689            | 53                            |
|                                                               | 10         | 158           | 385            | 544            | 722            | 64                            |
| <b>Poly(G<sub>32</sub>-S-P<sub>40</sub>-S-T<sub>21</sub>)</b> | 5          | 281           | 374            | 432            | 371            | 58                            |
|                                                               | 10         | 192           | 613            | 645            | 697            | 65                            |
| <b>Poly(G<sub>47</sub>-S-P<sub>28</sub>-S-T<sub>18</sub>)</b> | 5          | 143           | 491            | 700            | 715            | 68                            |
|                                                               | 10         | 118           | 159            | 249            | 483            | 55                            |
| <b>Poly(G<sub>46</sub>-b-P<sub>13</sub>)</b>                  | 5          | 79            | 108            | 85             | 96             | 84                            |
|                                                               | 10         | 78            | 89             | 92             | 73             | 109                           |
| <b>Poly(G<sub>46</sub>-b-P<sub>10</sub>-b-T<sub>2</sub>)</b>  | 5          | 78            | 113            | 151            | 202            | 66                            |
|                                                               | 10         | 130           | 214            | 224            | 252            | 159                           |
| <b>Poly(G<sub>46</sub>-b-P<sub>8</sub>-b-T<sub>9</sub>)</b>   | 5          | 180           | 308            | 607            | 776            | 66                            |
|                                                               | 10         | 163           | 298            | 577            | 712            | 72                            |
| <b>Poly(G<sub>46</sub>-b-P<sub>6</sub>-b-T<sub>17</sub>)</b>  | 5          | 181           | 289            | 549            | 720            | 69                            |
|                                                               | 10         | 173           | 322            | 432            | 567            | 72                            |
| <b>Poly(G<sub>46</sub>-b-T<sub>26</sub>)</b>                  | 5          | 130           | 169            | 208            | 266            | 87                            |
|                                                               | 10         | 145           | 301            | 476            | 564            | 97                            |
